# Supplementary material for: Corruption of the Intra-Gene DNA Methylation Architecture Is a Hallmark of Cancer
Source: PLOS journal article supplement (doi:10.1371/journal.pone.0068285), 2013-07-16

BRCA: Body vs. TSS1500 p=0.1

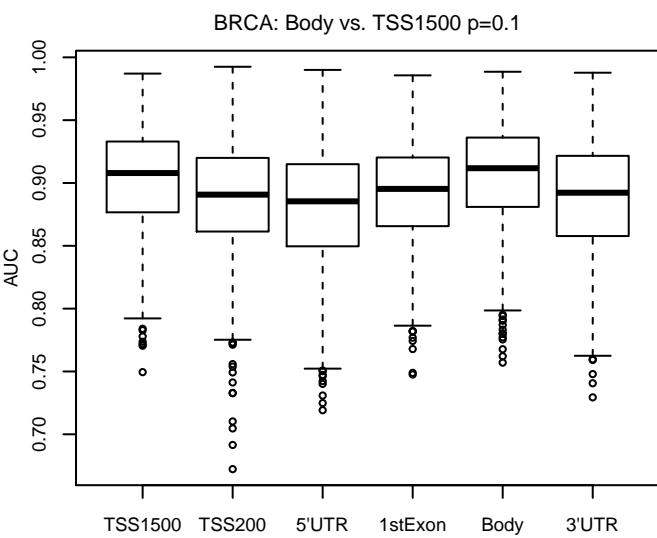

UCEC: TSS1500 vs. Body p=0.0023

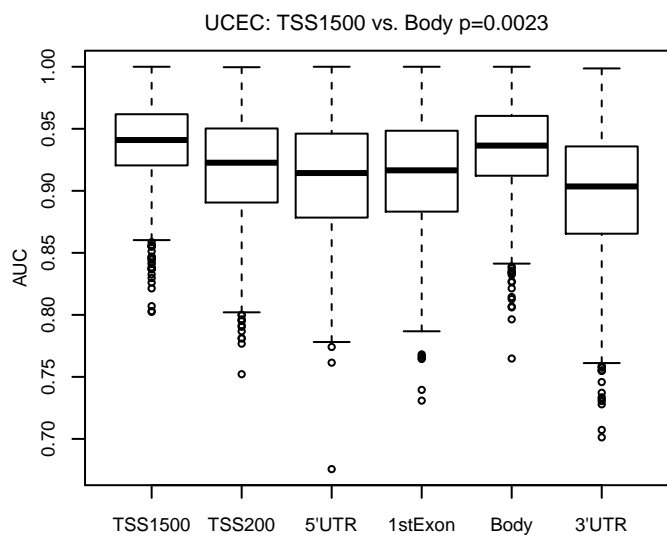

THCA: Body vs. TSS1500 p=1e-11

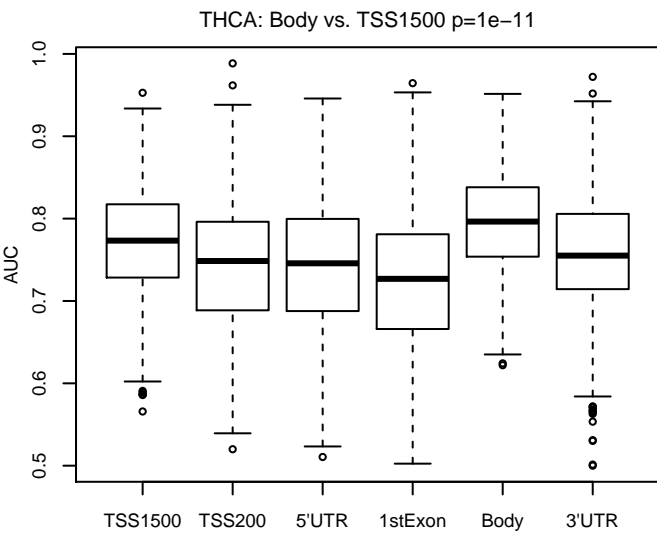

LUAD: Body vs. TSS1500 p=0.015

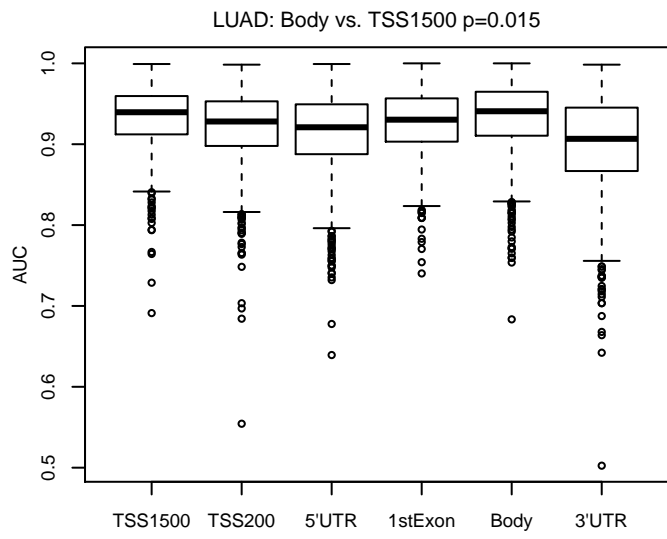

BLCA: TSS1500 vs. Body p=0.0012

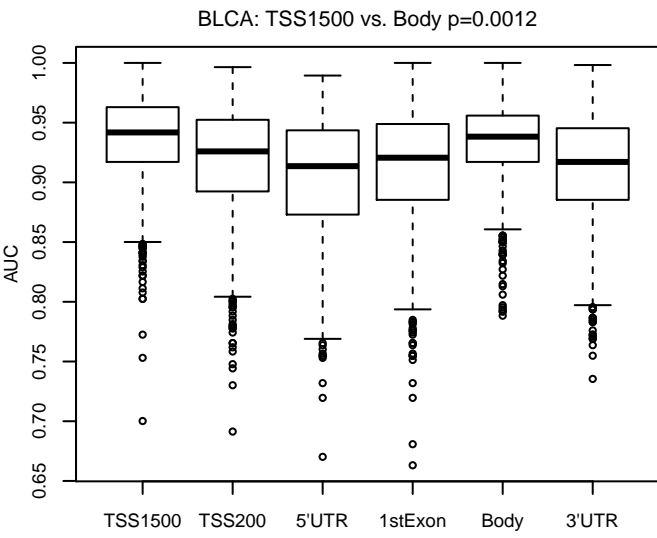

LUSC: Body vs. TSS1500 p=0.31

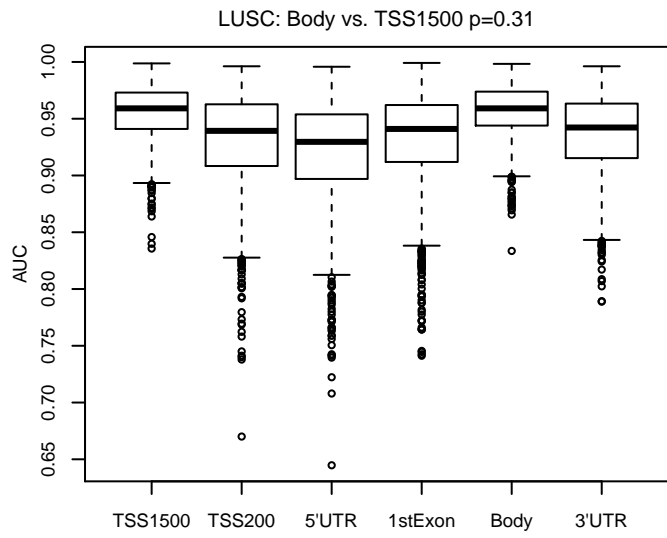

COAD: Body vs. TSS1500 p=0.11

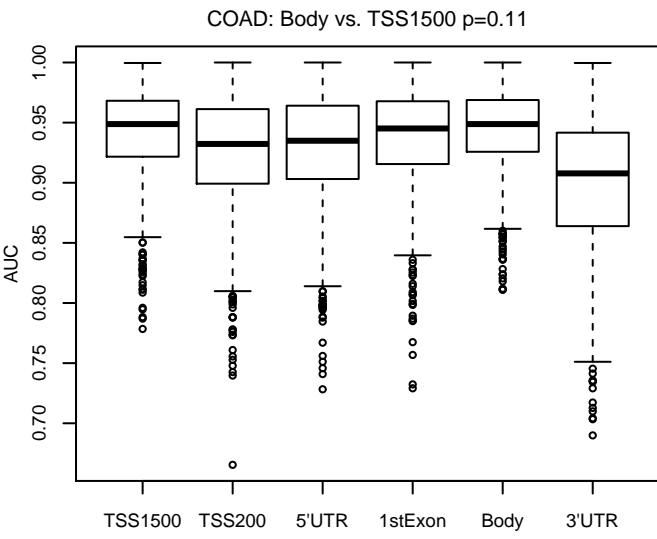

HNSC: Body vs. TSS1500 p=0.091

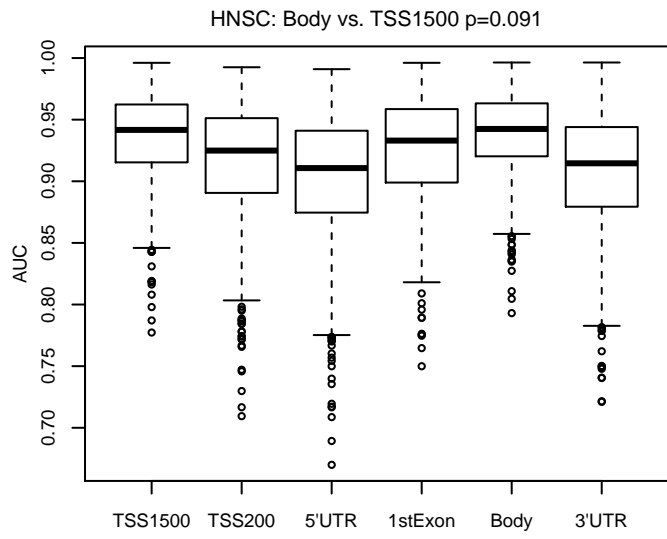

KIRC: Body vs. TSS1500 p=9.6e-22

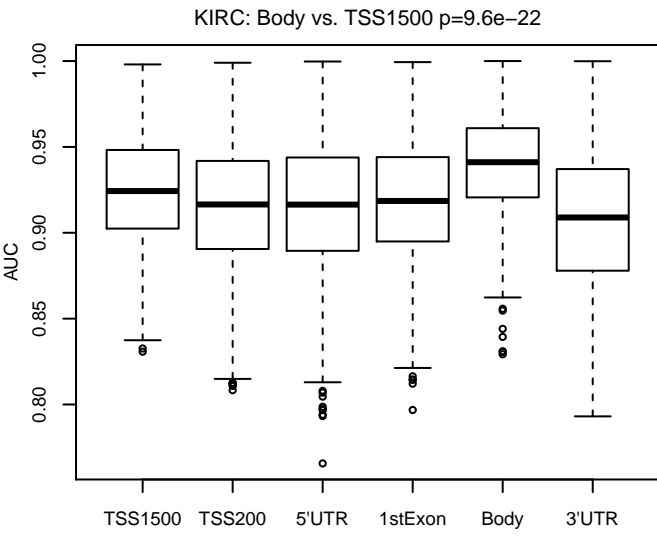

LIHC: TSS1500 vs. Body p=0.34

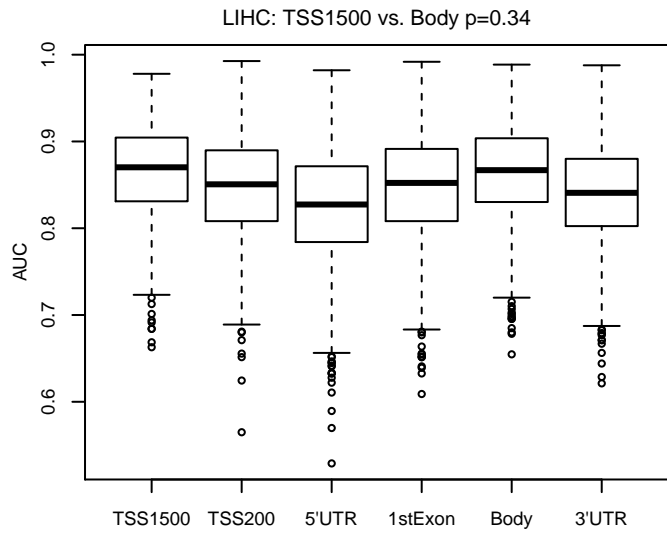

READ: Body vs. TSS1500 p=0.41

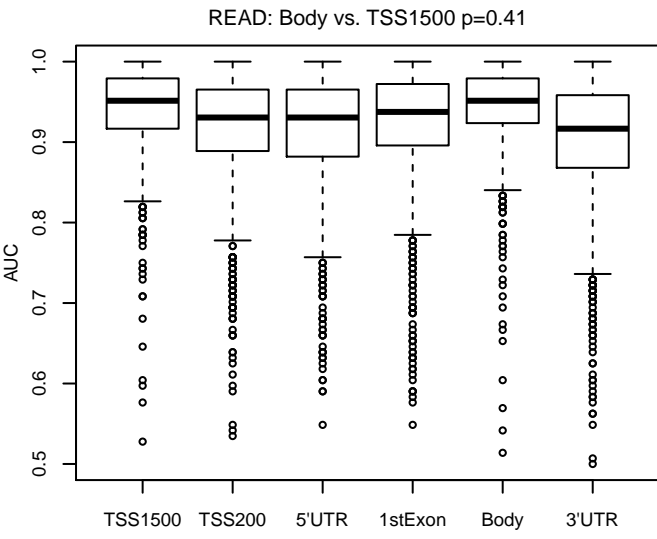

PRAD: TSS1500 vs. Body p=0.43

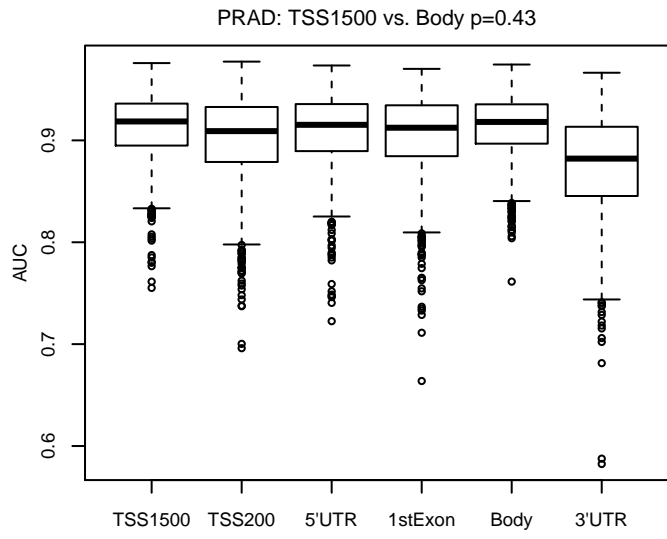

KIRP: Body vs. 3'UTR p=4.1e-09

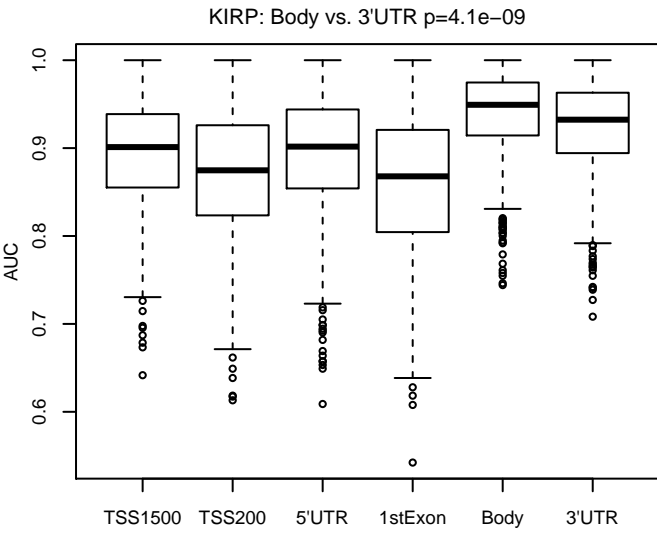

PAAD: Body vs. 1stExon p=8.6e-06

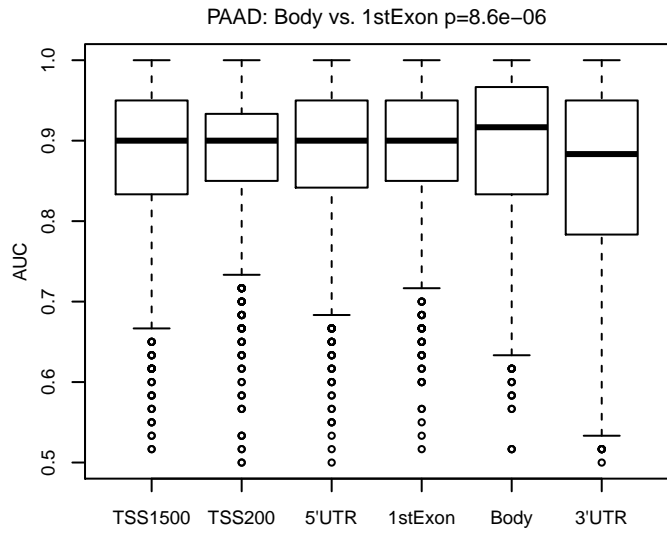

Supplement: S2 (10.1371/journal.pone.0068285.s002) [file journal.pone.0068285.s002]
