# Supplementary material for: Corruption of the Intra-Gene DNA Methylation Architecture Is a Hallmark of Cancer
Source: PLOS journal article supplement (doi:10.1371/journal.pone.0068285), 2013-07-16

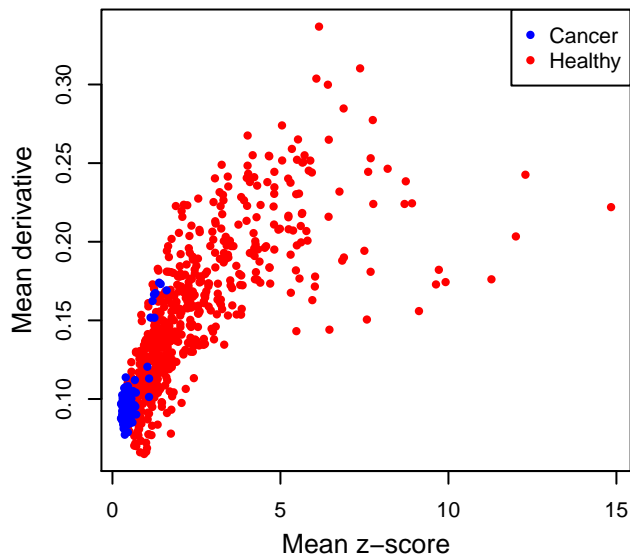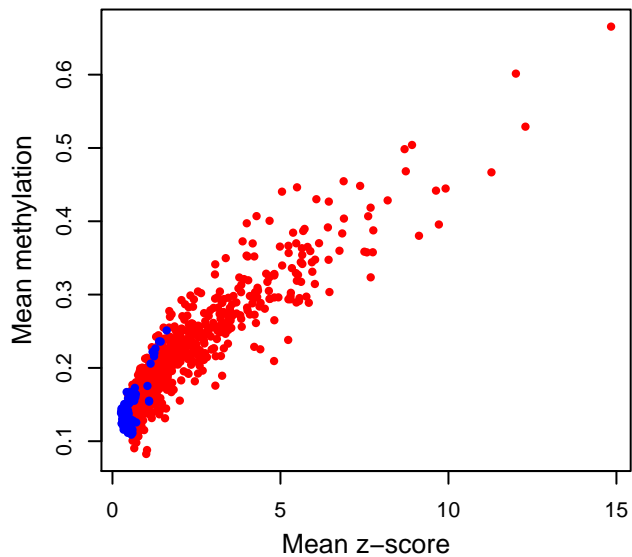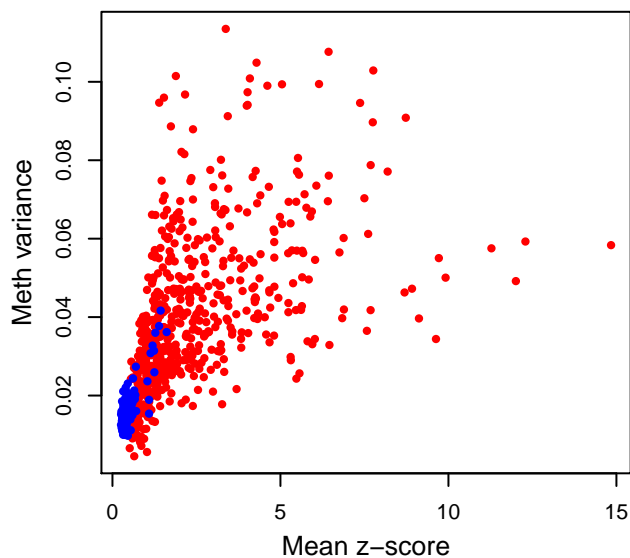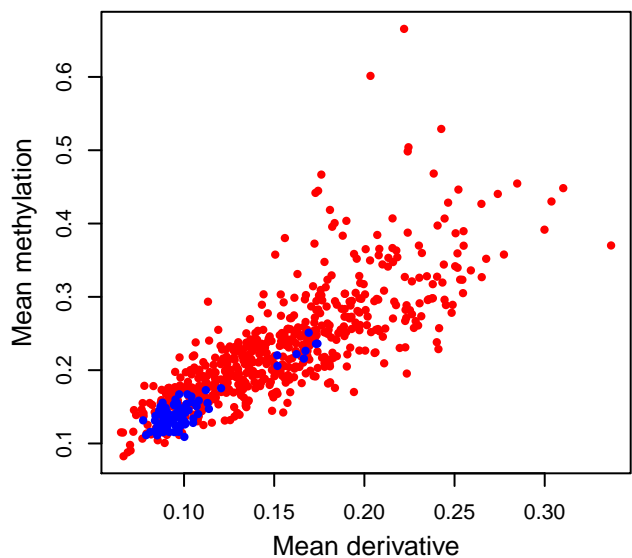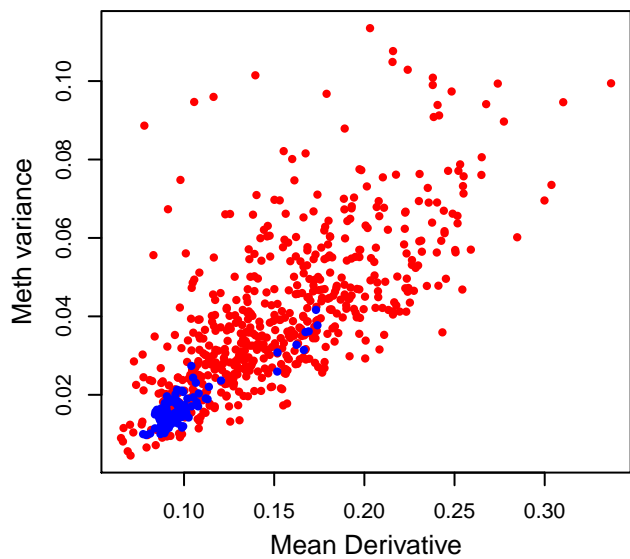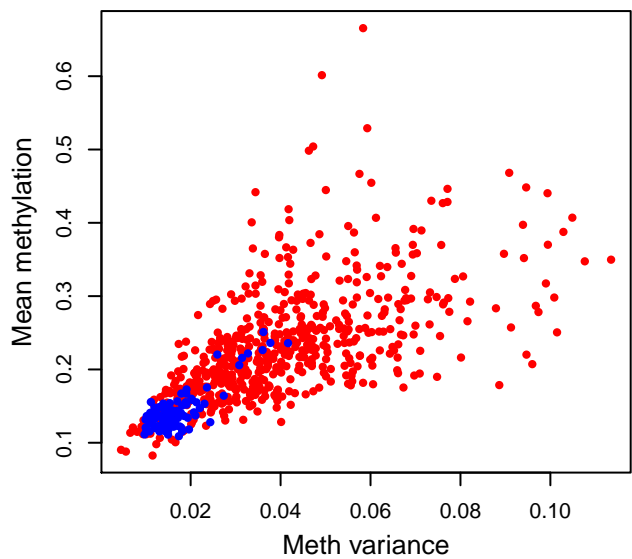

Supplement: S3 (10.1371/journal.pone.0068285.s003) [file journal.pone.0068285.s003]
